# Supplementary material for: Bimetal NiCo-MOF-74 for highly selective NO capture from flue gas under ambient conditions
Source: Royal Society of Chemistry journal article supplement (doi:10.1039/d2ra05974f), 2022-01-01
Supplement: d2ra05974f1.pdf [file d2ra05974f1.pdf]

## Supporting Information

### **Bimetal NiCo-MOF-74 for highly selective NO capture from flux gas at ambient conditions**

*Jie Hu<sup>#a</sup>, Lei Li<sup>#a</sup>, Hao Li<sup>a</sup>, Ying Zhai<sup>a</sup>, Fushun Tang<sup>\*a</sup>, Zhe Zhang<sup>a</sup>, and Banglin Chen<sup>\*b</sup>*

<sup>a</sup> *College of Chemistry and Bioengineering, Guilin University of Technology, Guilin 541004, China.)*

<sup>b</sup> *Department of Chemistry, The University of Texas at San Antonio, Texas*

*\*Corresponding author.*

*E-mail address: [tfushun@163.com](mailto:tfushun@163.com) (F. Tang); [banglin.chen@utsa.edu](mailto:banglin.chen@utsa.edu) (BL. Chen).*

*#These authors contributed equally to this work as co-first authors*

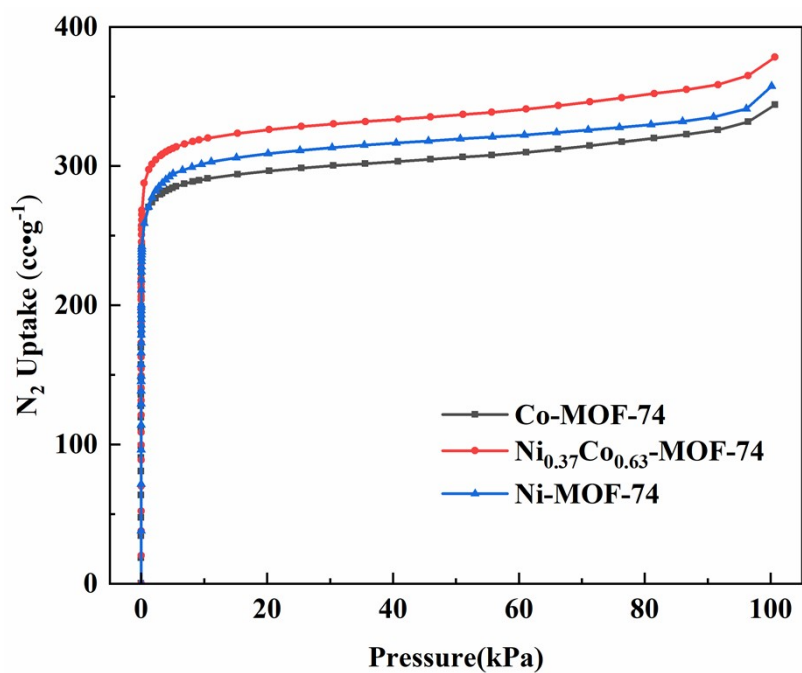

**Fig. S1.**  $\text{N}_2$  adsorption isotherms of Co-MOF-74, Ni-MOF-74 and  $\text{Ni}_{0.37}\text{Co}_{0.63}$ -MOF-74 at 77 K

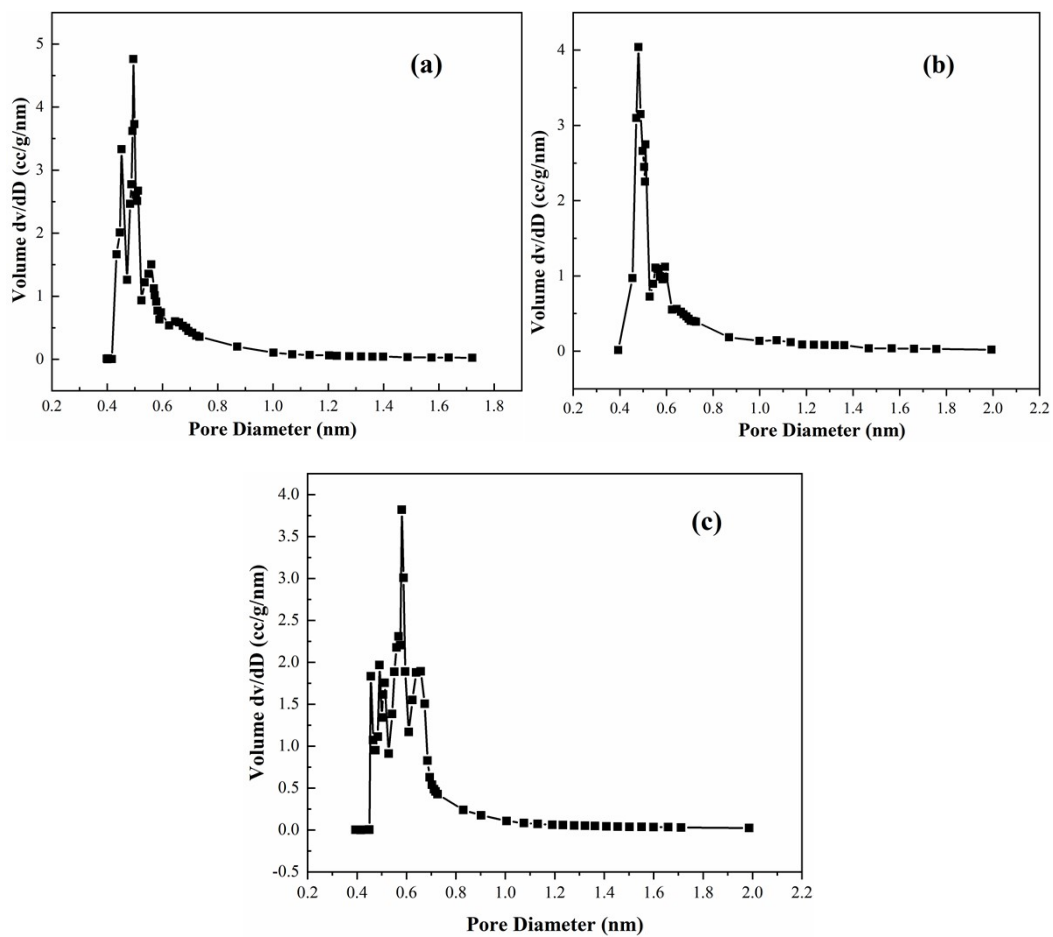

**Fig. S2.** Pore distribution curve of Co-MOF-74(a), Ni-MOF-74(b) and Ni<sub>0.37</sub>Co<sub>0.63</sub>-MOF-74(c)

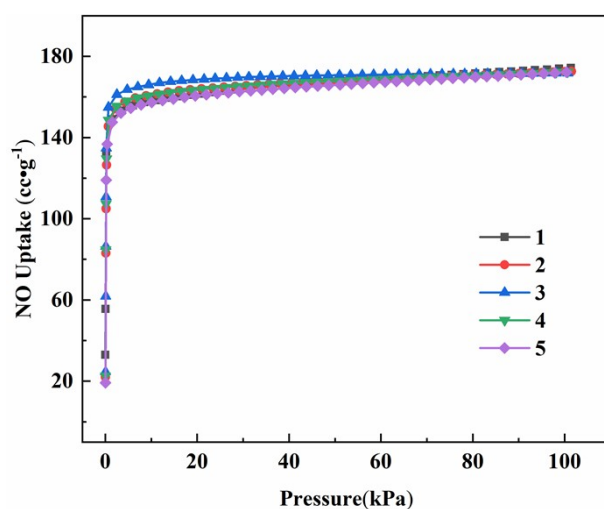

**Fig. S3.** The cyclic adsorption curve of Ni<sub>0.37</sub>Co<sub>0.63</sub>-MOF-74 for NO at different regeneration times at 100 kPa.

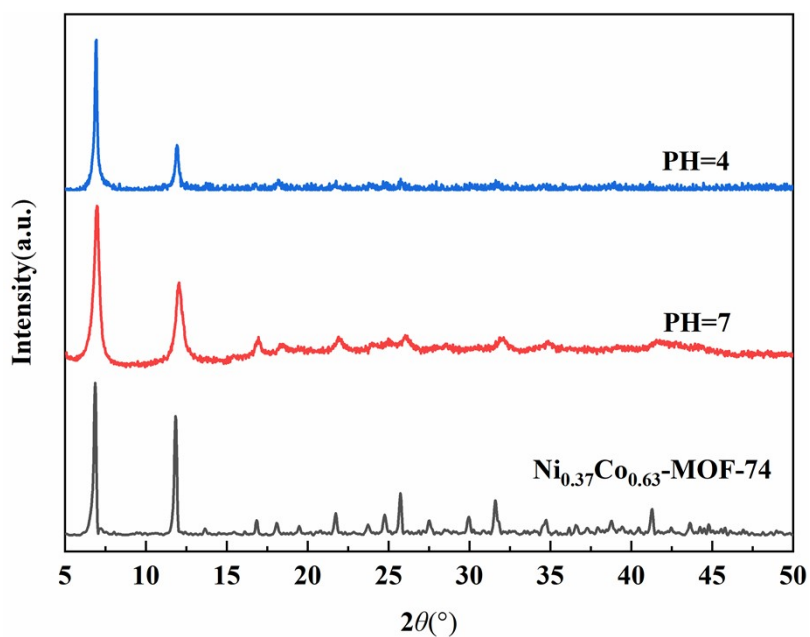

**Fig. S4.** XRD profile of Ni<sub>0.37</sub>Co<sub>0.63</sub>-MOF-74 after soaking in pH=4 and pH=7 for 72 hours.

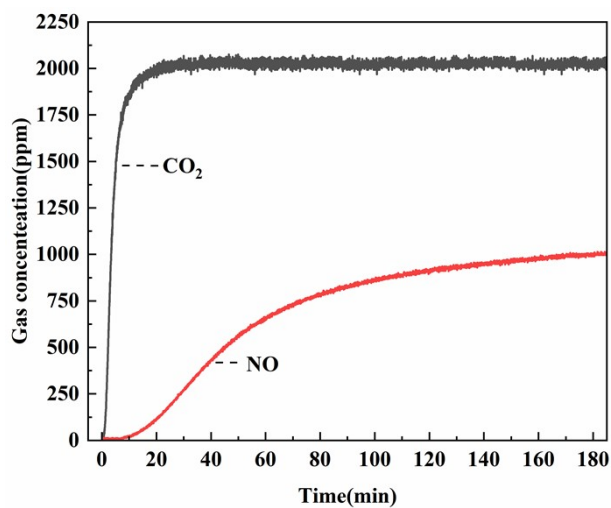

**Fig. S5.** The adsorption curve of Ni<sub>0.37</sub>Co<sub>0.63</sub>-MOF-74 in breakthrough experiment

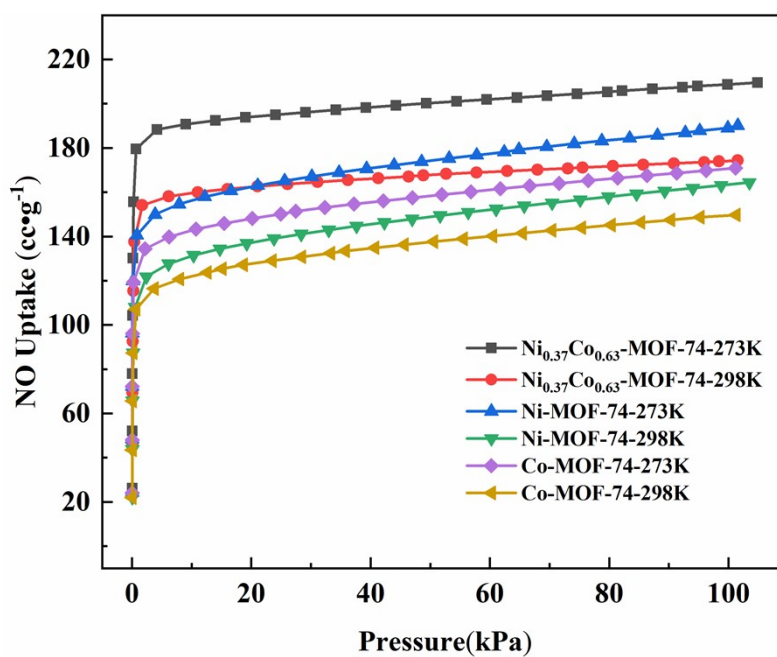

**Fig. S6.** NO isotherm at 273 K and 298 K of Co-MOF-74, Ni-MOF-74 and Ni<sub>0.37</sub>Co<sub>0.63</sub>-MOF-74
